# Supplementary material for: Biomarkers of pathogen exposure in wild boar for integrated wildlife monitoring
Source: Research Square preprint supplement (doi:10.21203/rs.3.rs-8099905/v1), 2026-01-22
Supplement: Supplementary file 1 [file 28797582367f9f945a3a28f8.docx]

**Supplementary information**

**Biomarkers of pathogen exposure in wild boar for integrated wildlife monitoring**

Alberto Perelló*1, Marinela Contreras1, José Joaquín Cerón2, José de la Fuente1,3, Christian Gortázar1.

1· SaBio, Instituto de Investigación en Recursos Cinegéticos (IREC) CSIC-UCLM-JCCM, 13071 Ciudad Real, España; 2· Interdisciplinary Laboratory of Clinical Pathology, Interlab-UMU, University of Murcia, 30003 Murcia, Spain; 3· Department of Veterinary Pathobiology, Center for Veterinary Health Sciences, Oklahoma State University, Stillwater, OK 74078, USA.

*Corresponding author: Alberto Perelló (albertoperellojimenez@gmail.com; +34 679848427; ORCID 0000-0001-6238-9048).

**Supplementary table 1.** ELISA kits of the 14 pathogens analysed.

| **Pathogen** | **Reference** | **Kit name** |
| --- | --- | --- |
|
| **Aujeszky disease virus** | 11.GEP.K.3 | Ingezim ADVgE Plus. |
| ***Brucella* spp*.*** | 10.BRU.K.3 | Ingezim Brucella compac 2.0. |
| ***Coxiella burnetii*** | ELISACOXL S2 | PrioCheck Rumiant Coxellia. |
| ***Erysipelothrix rhusiopathiae*** | 11.MR.K.1/5 | Ingezim Mal Rojo. |
| **Porcine circovirus type 2** | 11.PCV.K.1/5 | Ingezim CIRCO IgG. |
| **Influenza A virus** | 99-53101 | Prueba IDEXX Influenza A Ab. |
| ***Mycobacterium hyopneumoniae*** | 11.MHY.K.3/5 | Ingezim M.hyo Compac. |
| **E hepatitis virus** | HEVB-MS-4P | ID Screen Hepatitis E Indirecta Multiespecies. |
| ***Toxoplasma gondii*** | 7610230 | Priiocheck Porcine Toxoplasma. |
| ***Salmonella* spp.** | 7610660 | Priiocheck Porcine Salmonella. |
| **Canine distemper virus** | 15.CDG.K.1 | Ingezim Moquillo IgG. |
| **Crimea-Congo haemorrhagic fever virus** | CCHFDA-5P | ID Screen CCHF Double Antigen Multispecies. |
| **Epizootic haemorrhagic disease virus** | EHDVC-5P | ID Screen EHDV Competition. |
| ***Mycobacterium tuberculosis* complex** | Thomas et al. 2019 | P22-ELISA. In-house. |

Initial exploratory analysis.

**Supplementary table 2.** Spearman correlation results of biomarkers with individual pathogen richness.

| Variable | rs | *p* |
| --- | --- | --- |
| CRP | 0.14 | 0.03 |
| HAPTO | 0.15 | 0.02 |
| CUPRAC | 0.22 | 0.0008 |
| ADA | 0.31 | 2.93e-6 |
| α-GAL | 0.37 | 1.47e-8 |

—α-GAL: antibodies absorbance against alpha-gal; HAPTO: haptoglobin; CRP: C reactive protein; CUPRAC: cupric reducing antioxidant capacity; ADA: adenosine deaminase—

**Supplementary table 3.** Kruskal-Wallis results.

| Variable | Chi square | *p* |
| --- | --- | --- |
| CRP | 4.43 | 0.11 |
| HAPTO | 4.55 | 0.10 |
| CUPRAC | 8.25 | 0.02 |
| ADA | 19.31 | 6.41e-5 |
| α-GAL | 25.62 | 2.73e-6 |

—α-GAL: antibodies absorbance against alpha-gal; HAPTO: haptoglobin; CRP: C reactive protein; CUPRAC: cupric reducing antioxidant capacity; ADA: adenosine deaminase—

Best serum biomarker analysis.

**Supplementary table 4**. Univariate analysis results.

| Variable | AIC | Pseudo_r2 | RMSE | Correlation |
| --- | --- | --- | --- | --- |
| **α-GAL** | **952.28** | **0.07** | **2.06** | **0.26** |
| CUPRAC | 968.85 | 0.03 | 2.09 | 0.18 |
| ADA | 971.14 | 0.02 | 2.11 | 0.14 |
| CRP | 973.25 | 0.01 | 2.11 | 0.12 |
| HAPTO | 977.24 | 0.003 | 2.13 | 0.05 |

— RMSE: root mean square error; α-GAL: antibodies absorbance against alpha-gal; HAPTO: haptoglobin; CRP: C reactive protein; CUPRAC: cupric reducing antioxidant capacity; ADA: adenosine deaminase—

**Supplementary table 5.** Cross-validation. RMSE ranking.

| **α-GAL** | CUPRAC | CRP | HAPTO | ADA |
| --- | --- | --- | --- | --- |
| **2.07** | 2.09 | 2.12 | 2.12 | 3.03 |

—α-GAL: antibodies absorbance against alpha-gal; HAPTO: haptoglobin; CRP: C reactive protein; CUPRAC: cupric reducing antioxidant capacity; ADA: adenosine deaminase—

**Supplementary table 6.** Relative dominance.

| **α-GAL** | ADA | CUPRAC | CRP | HAPTO |
| --- | --- | --- | --- | --- |
| **0.63** | 0.15 | 0.13 | 0.08 | 0.01 |

—α-GAL: antibodies absorbance against alpha-gal; HAPTO: haptoglobin; CRP: C reactive protein; CUPRAC: cupric reducing antioxidant capacity; ADA: adenosine deaminase—

**Supplementary table 7.** ROC. AUC ranking.

| **α-GAL** | ADA | CUPRAC | CRP | HAPTO |
| --- | --- | --- | --- | --- |
| **0.72** | 0.65 | 0.62 | 0.57 | 0.56 |

—α-GAL: antibodies absorbance against alpha-gal; HAPTO: haptoglobin; CRP: C reactive protein; CUPRAC: cupric reducing antioxidant capacity; ADA: adenosine deaminase—

**Supplementary table 8.** GLMM selection table.

|  | Intercept | ADA | α-GAL | CRP | CUPRAC | HAPTO | df | logLik | AICc | delta | weight |
| --- | --- | --- | --- | --- | --- | --- | --- | --- | --- | --- | --- |
| **3** | **1.06** |  | **0.10** |  |  |  | **3.00** | **-430.36** | **866.80** | **0.00** | **0.19** |
| **7** | **1.06** |  | **0.10** | **-0.04** |  |  | **4.00** | **-429.70** | **867.60** | **0.75** | **0.13** |
| **19** | **1.06** |  | **0.10** |  |  | **-0.04** | **4.00** | **-429.87** | **867.90** | **1.09** | **0.11** |
| 4 | 1.06 | 0.01 | 0.10 |  |  |  | 4.00 | -430.33 | 868.80 | 2.01 | 0.07 |
| 11 | 1.06 |  | 0.10 |  | 0.01 |  | 4.00 | -430.33 | 868.80 | 2.01 | 0.07 |
| 23 | 1.06 |  | 0.10 | -0.03 |  | -0.02 | 5.00 | -429.54 | 869.40 | 2.52 | 0.05 |
| 8 | 1.06 | 0.01 | 0.10 | -0.04 |  |  | 5.00 | -429.66 | 869.60 | 2.77 | 0.05 |
| 15 | 1.06 |  | 0.09 | -0.04 | 0.01 |  | 5.00 | -429.67 | 869.60 | 2.78 | 0.05 |
| 20 | 1.06 | 0.01 | 0.10 |  |  | -0.04 | 5.00 | -429.85 | 870.00 | 3.15 | 0.04 |
| 27 | 1.06 |  | 0.10 |  | 0.00 | -0.04 | 5.00 | -429.86 | 870.00 | 3.17 | 0.04 |

—α-GAL: antibodies absorbance against alpha-gal; HAPTO: haptoglobin; CRP: C reactive protein; CUPRAC: cupric reducing antioxidant capacity; ADA: adenosine deaminase—
